# Supplementary material for: FKBP4 integrates FKBP4/Hsp90/IKK with FKBP4/Hsp70/RelA complex to promote lung adenocarcinoma progression via IKK/NF-κB signaling
Source: PubMed Central journal article supplement (PMC8192522; doi:10.1038/s41419-021-03857-8), 2021-06-10
Supplement: 41419_2021_3857_MOESM1_ESM.pdf [file 41419_2021_3857_MOESM1_ESM.pdf]

## Supplementary Material

### Supplementary Figure and Table Legends

**Supplementary Figure S1.** (A) The mRNA levels of FKBP4 in human LUAD were remarkably elevated compared with those in normal tissues, as determined from three independent datasets in the OncoPrint database. (B) ROC analysis of OS using the TNM stage and FKBP4 expression.

**Table S1.** Overall survival data and FKBP4 FPKM values of LUAD patients based on TCGA database

**Table S2.** RNA-seq data of IKK/NF- $\kappa$ B pathway related genes in the control and FKBP4-knockdown groups

**Table S3.** FKBP4 BioID-based interactome.

Figure S1

A

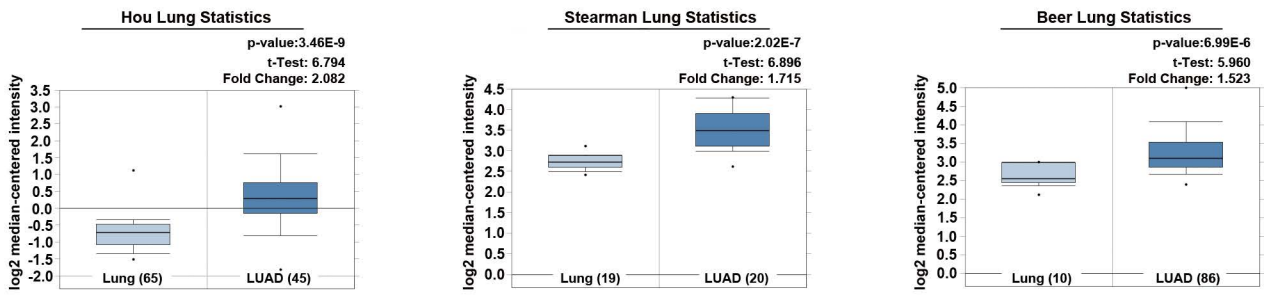

B

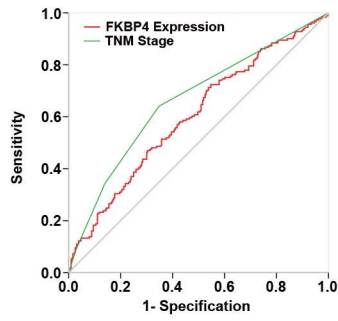

|                            | FKBP4 Expression | TNM Stage |
|----------------------------|------------------|-----------|
| Cut-off value              | 10.8319          | I stage   |
| Area Under the Curve (AUC) | 0.602            | 0.663     |
| Sensitivity                | 72.68            | 64.09     |
| Sepecification             | 45.03            | 65.19     |

**Table S1****High Expression of FKBP4**

| sampleID        | FKBP4 expression | _OS (days) | vital_status |
|-----------------|------------------|------------|--------------|
| TCGA-55-6985-01 | 10.9049          | 1233       | LIVING       |
| TCGA-55-6975-01 | 11.7486          | 118        | DECEASED     |
| TCGA-55-6987-01 | 12.1147          | 2137       | LIVING       |
| TCGA-55-8204-01 | 11.2982          | 515        | LIVING       |
| TCGA-55-8302-01 | 12.2892          | 478        | LIVING       |
| TCGA-55-7570-01 | 12.0361          | 824        | LIVING       |
| TCGA-55-8299-01 | 10.9505          | 469        | DECEASED     |
| TCGA-55-7907-01 | 11.3473          | 343        | DECEASED     |
| TCGA-55-8301-01 | 12.4307          | 534        | LIVING       |
| TCGA-55-8203-01 | 11.4864          | 547        | LIVING       |
| TCGA-49-4490-01 | 11.4736          | 385        | DECEASED     |
| TCGA-55-7576-01 | 11.9737          | 670        | LIVING       |
| TCGA-55-8616-01 | 10.9786          | 48         | LIVING       |
| TCGA-55-7903-01 | 12.217           | 567        | LIVING       |
| TCGA-55-7725-01 | 10.9459          | 442        | LIVING       |
| TCGA-55-6986-01 | 10.8378          | 3261       | LIVING       |
| TCGA-55-1595-01 | 11.6506          | 1479       | LIVING       |
| TCGA-95-7043-01 | 11.9813          | 503        | DECEASED     |
| TCGA-73-4668-01 | 11.0541          | 467        | LIVING       |
| TCGA-91-6831-01 | 11.9569          | 310        | LIVING       |
| TCGA-50-5944-01 | 11.0566          | 1750       | LIVING       |
| TCGA-62-8397-01 | 11.9766          | 1289       | LIVING       |
| TCGA-55-6984-01 | 12.435           | 760        | DECEASED     |
| TCGA-55-6972-01 | 10.9391          | 1632       | DECEASED     |
| TCGA-55-7726-01 | 12.2385          | 652        | LIVING       |
| TCGA-99-8033-01 | 13.4089          | 656        | DECEASED     |
| TCGA-69-7764-01 | 11.2313          | 414        | LIVING       |
| TCGA-69-8453-01 | 11.2519          | 813        | LIVING       |
| TCGA-55-8094-01 | 12.7685          | 541        | LIVING       |
| TCGA-73-4666-01 | 11.9013          | 800        | LIVING       |
| TCGA-78-7220-01 | 11.7982          | 807        | DECEASED     |
| TCGA-55-6980-01 | 11.7139          | 2109       | LIVING       |
| TCGA-55-7913-01 | 11.0292          | 561        | DECEASED     |
| TCGA-55-8085-01 | 12.2145          | 904        | LIVING       |
| TCGA-62-8394-01 | 10.9975          | 139        | DECEASED     |
| TCGA-38-4625-01 | 12.2078          | 2973       | LIVING       |
| TCGA-38-4631-01 | 12.8958          | 354        | DECEASED     |
| TCGA-78-7162-01 | 11.2575          | 3169       | DECEASED     |
| TCGA-55-8614-01 | 10.9494          | 536        | LIVING       |
| TCGA-55-7724-01 | 11.9314          | 705        | LIVING       |
| TCGA-78-7167-01 | 11.0384          | 2681       | DECEASED     |
| TCGA-55-6978-01 | 11.4892          | 176        | DECEASED     |
| TCGA-75-6205-01 | 11.177           |            | DECEASED     |
| TCGA-75-5147-01 | 11.7294          | 1333       | LIVING       |
| TCGA-05-4420-01 | 12.2648          | 912        | LIVING       |
| TCGA-38-4632-01 | 12.0683          | 1357       | DECEASED     |
| TCGA-55-6981-01 | 11.8187          | 1379       | DECEASED     |
| TCGA-78-8640-01 | 12.0452          | 7062       | LIVING       |
| TCGA-78-7160-01 | 11.8917          | 697        | DECEASED     |
| TCGA-38-4628-01 | 12.4946          | 1492       | DECEASED     |
| TCGA-49-4506-01 | 12.759           | 999        | DECEASED     |
| TCGA-J2-8194-01 | 11.092           | 724        | LIVING       |
| TCGA-55-7911-01 | 11.7376          | 537        | LIVING       |
| TCGA-95-7562-01 | 11.0914          | 87         | DECEASED     |
| TCGA-78-7146-01 | 13.1614          | 173        | DECEASED     |
| TCGA-97-8179-01 | 11.8865          | 435        | LIVING       |
| TCGA-55-7995-01 | 11.9081          | 889        | LIVING       |
| TCGA-64-5815-01 | 11.1083          | 866        | LIVING       |
| TCGA-78-8655-01 | 11.0021          | 2360       | LIVING       |
| TCGA-75-6211-01 | 11.5414          |            | DECEASED     |
| TCGA-35-4123-01 | 11.2973          | 182        | LIVING       |
| TCGA-91-6836-01 | 11.5425          | 417        | LIVING       |
| TCGA-55-1596-01 | 11.2657          | 2065       | LIVING       |
| TCGA-50-5936-01 | 12.0691          | 257        | DECEASED     |
| TCGA-05-4430-01 | 11.1376          | 761        | LIVING       |
| TCGA-78-7150-01 | 12.0938          | 666        | DECEASED     |
| TCGA-50-6591-01 | 11.6158          | 119        | DECEASED     |
| TCGA-78-7152-01 | 11.2621          | 1215       | DECEASED     |
| TCGA-55-8096-01 | 10.9355          | 719        | DECEASED     |
| TCGA-55-8615-01 | 11.7105          | 446        | LIVING       |
| TCGA-78-7155-01 | 11.1791          | 1171       | DECEASED     |
| TCGA-05-4382-01 | 11.5316          | 607        | LIVING       |
| TCGA-67-4679-01 | 11.0047          | 448        | LIVING       |
| TCGA-05-5715-01 | 11.2356          | 62         | LIVING       |
| TCGA-69-7979-01 | 11.1755          | 408        | LIVING       |
| TCGA-55-6712-01 | 11.2557          | 171        | DECEASED     |
| TCGA-78-7148-01 | 11.8782          | 626        | DECEASED     |
| TCGA-49-4487-01 | 11.5337          | 855        | DECEASED     |
| TCGA-78-7154-01 | 12.5131          | 593        | DECEASED     |
| TCGA-05-4405-01 | 10.9471          | 610        | LIVING       |
| TCGA-73-4677-01 | 11.2636          | 38         | DECEASED     |
| TCGA-91-6829-01 | 11.5033          | 1258       | DECEASED     |
| TCGA-78-7166-01 | 11.7894          | 258        | DECEASED     |
| TCGA-75-7031-01 | 10.9626          |            | LIVING       |
| TCGA-44-6779-01 | 11.3188          | 500        | DECEASED     |
| TCGA-44-5644-01 | 11.958           | 863        | LIVING       |
| TCGA-64-5781-01 | 11.0375          | 1559       | LIVING       |

|                 |         |      |          |
|-----------------|---------|------|----------|
| TCGA-50-5941-01 | 11.2745 | 1474 | LIVING   |
| TCGA-62-8398-01 | 12.4067 | 444  | DECEASED |
| TCGA-69-7765-01 | 11.2095 | 165  | LIVING   |
| TCGA-78-7542-01 | 12.455  | 321  | DECEASED |
| TCGA-05-5428-01 | 11.76   | 670  | LIVING   |
| TCGA-64-1679-01 | 11.3166 | 2488 | LIVING   |
| TCGA-55-5899-01 | 11.6162 | 930  | LIVING   |
| TCGA-69-7978-01 | 10.8742 | 134  | LIVING   |
| TCGA-55-6543-01 | 11.0209 | 435  | LIVING   |
| TCGA-05-5429-01 | 11.2016 | 275  | DECEASED |
| TCGA-55-8620-01 | 11.3157 | 375  | DECEASED |
| TCGA-55-8508-01 | 11.5168 | 617  | LIVING   |
| TCGA-44-7662-01 | 10.9775 | 218  | LIVING   |
| TCGA-95-7567-01 | 12.1965 | 568  | LIVING   |
| TCGA-62-8399-01 | 11.01   | 2696 | LIVING   |
| TCGA-05-4410-01 | 11.1151 |      | LIVING   |
| TCGA-44-7671-01 | 11.01   | 889  | LIVING   |
| TCGA-44-2662-01 | 11.3745 | 1280 | LIVING   |
| TCGA-05-5420-01 | 11.4898 | 457  | LIVING   |
| TCGA-35-4122-01 | 12.3642 | 225  | LIVING   |
| TCGA-64-1678-01 | 11.904  | 1189 | LIVING   |
| TCGA-78-7149-01 | 11.2523 | 3940 | LIVING   |
| TCGA-69-8255-01 | 13.2367 | 129  | LIVING   |
| TCGA-44-7660-01 | 11.8919 | 592  | LIVING   |
| TCGA-86-6851-01 | 11.7933 | 179  | LIVING   |
| TCGA-49-4507-01 | 12.1761 | 268  | DECEASED |
| TCGA-05-4395-01 | 13.6588 | 0    | DECEASED |
| TCGA-64-1677-01 | 11.1346 | 628  | DECEASED |
| TCGA-55-8513-01 | 11.4156 | 791  | LIVING   |
| TCGA-62-8395-01 | 11.2452 | 1216 | LIVING   |
| TCGA-55-7994-01 | 11.0886 | 603  | LIVING   |
| TCGA-67-3773-01 | 10.8347 | 427  | LIVING   |
| TCGA-75-6207-01 | 12.3539 |      | DECEASED |
| TCGA-05-4415-01 | 13.1093 | 91   | DECEASED |
| TCGA-91-6848-01 | 11.8419 | 224  | LIVING   |
| TCGA-78-7158-01 | 12.0426 | 179  | DECEASED |
| TCGA-78-7143-01 | 10.8344 | 4961 | DECEASED |
| TCGA-55-8506-01 | 11.1766 | 11   | LIVING   |
| TCGA-78-7156-01 | 11.9619 | 976  | DECEASED |
| TCGA-97-7937-01 | 11.7083 | 564  | LIVING   |
| TCGA-55-6970-01 | 11.6656 | 464  | DECEASED |
| TCGA-86-7954-01 | 11.0307 | 605  | LIVING   |
| TCGA-78-7536-01 | 11.8235 | 244  | DECEASED |
| TCGA-78-8660-01 | 11.982  | 321  | DECEASED |
| TCGA-05-4244-01 | 11.6474 |      | LIVING   |
| TCGA-05-4424-01 | 12.292  | 913  | LIVING   |
| TCGA-69-7760-01 | 11.2289 | 202  | LIVING   |
| TCGA-55-8511-01 | 12.2696 | 552  | LIVING   |
| TCGA-55-8091-01 | 11.587  | 600  | LIVING   |
| TCGA-55-8205-01 | 11.1256 | 599  | LIVING   |
| TCGA-49-6745-01 | 10.8557 | 522  | LIVING   |
| TCGA-05-4433-01 | 11.2864 | 730  | LIVING   |
| TCGA-50-6673-01 | 11.0091 | 22   | DECEASED |
| TCGA-50-5051-01 | 11.5927 | 478  | DECEASED |
| TCGA-50-5930-01 | 10.8767 | 282  | DECEASED |
| TCGA-44-2668-01 | 11.2546 | 761  | DECEASED |
| TCGA-44-5643-01 | 14.4638 | 1013 | LIVING   |
| TCGA-78-8648-01 | 11.117  | 1209 | DECEASED |
| TCGA-55-8505-01 | 11.5829 | 440  | LIVING   |
| TCGA-73-4659-01 | 11.4455 | 711  | DECEASED |
| TCGA-49-4501-01 | 10.9575 | 1421 | DECEASED |
| TCGA-95-7947-01 | 11.9257 | 477  | LIVING   |
| TCGA-05-5425-01 | 11.2964 | 882  | LIVING   |
| TCGA-05-4418-01 | 12.9995 | 274  | DECEASED |
| TCGA-73-4670-01 | 13.5681 | 131  | LIVING   |
| TCGA-44-7659-01 | 11.3737 | 691  | LIVING   |
| TCGA-99-8025-01 | 11.453  | 1060 | LIVING   |
| TCGA-99-7458-01 | 11.0001 | 747  | LIVING   |
| TCGA-50-5072-01 | 13.0337 | 250  | DECEASED |
| TCGA-91-8499-01 | 12.0275 | 36   | LIVING   |
| TCGA-75-5126-01 | 11.9156 |      | LIVING   |
| TCGA-95-7948-01 | 12.2815 | 476  | LIVING   |
| TCGA-35-5375-01 | 11.4952 | 264  | LIVING   |
| TCGA-99-8032-01 | 11.7884 | 44   | LIVING   |
| TCGA-44-2659-01 | 11.3121 | 1367 | LIVING   |
| TCGA-78-7540-01 | 11.5065 | 1197 | DECEASED |
| TCGA-05-4434-01 | 12.026  | 457  | DECEASED |
| TCGA-38-4629-01 | 10.9105 | 864  | DECEASED |
| TCGA-05-4389-01 | 11.6116 | 1369 | LIVING   |
| TCGA-95-7944-01 | 12.5785 | 377  | LIVING   |
| TCGA-64-5775-01 | 12.7283 | 62   | DECEASED |
| TCGA-69-7761-01 | 11.4449 | 186  | LIVING   |
| TCGA-05-4417-01 | 11.8402 | 455  | LIVING   |
| TCGA-78-7145-01 | 11.1238 | 826  | DECEASED |
| TCGA-05-5423-01 | 10.9628 | 151  | LIVING   |
| TCGA-95-8494-01 | 10.8567 | 84   | LIVING   |
| TCGA-44-7661-01 | 11.2937 | 557  | DECEASED |
| TCGA-50-5044-01 | 11.8268 | 624  | DECEASED |
| TCGA-55-8208-01 | 11.0788 | 674  | LIVING   |
| TCGA-50-5932-01 | 10.9362 | 1235 | DECEASED |
| TCGA-49-4514-01 | 11.8037 | 1700 | LIVING   |
| TCGA-73-4658-01 | 11.3071 | 1600 | DECEASED |

|                 |         |      |          |
|-----------------|---------|------|----------|
| TCGA-80-5607-01 | 11.0607 |      | LIVING   |
| TCGA-75-7027-01 | 12.3241 | 3059 | LIVING   |
| TCGA-73-4676-01 | 10.8501 | 281  | DECEASED |
| TCGA-49-6767-01 | 11.5816 | 677  | LIVING   |
| TCGA-44-7670-01 | 11.0855 | 882  | LIVING   |
| TCGA-05-4398-01 | 12.8491 | 1431 | LIVING   |
| TCGA-64-1676-01 | 11.0326 | 1728 | LIVING   |
| TCGA-44-6776-01 | 11.2458 | 2616 | LIVING   |
| TCGA-49-4505-01 | 11.5273 | 428  | DECEASED |
| TCGA-44-6145-01 | 11.0862 | 595  | LIVING   |
| TCGA-50-5946-01 | 11.3183 | 1617 | LIVING   |
| TCGA-97-8174-01 | 10.8814 | 164  | DECEASED |
| TCGA-05-4422-01 | 11.6338 | 365  | LIVING   |
| TCGA-50-5066-01 | 11.5998 | 1442 | LIVING   |
| TCGA-50-5066-02 | 12.2044 | 1442 | LIVING   |
| TCGA-91-6849-01 | 10.878  | 35   | LIVING   |
| TCGA-05-4403-01 | 11.8677 | 578  | LIVING   |
| TCGA-50-6594-01 | 11.0618 | 370  | DECEASED |
| TCGA-05-4402-01 | 12.0163 | 244  | DECEASED |
| TCGA-73-4675-01 | 11.3245 | 922  | DECEASED |
| TCGA-91-6830-01 | 11.1869 | 60   | LIVING   |
| TCGA-69-7980-01 | 10.9981 | 362  | LIVING   |
| TCGA-49-4486-01 | 11.2314 | 2318 | DECEASED |
| TCGA-50-6590-01 | 12.565  | 1288 | DECEASED |
| TCGA-86-8281-01 | 11.0447 |      | LIVING   |
| TCGA-38-4630-01 | 12.1321 | 1073 | DECEASED |
| TCGA-05-4396-01 | 10.8687 | 303  | DECEASED |
| TCGA-93-8067-01 | 12.3503 | 186  | LIVING   |
| TCGA-75-5125-01 | 11.7961 | 2027 | DECEASED |
| TCGA-86-8076-01 | 11.2953 | 993  | LIVING   |
| TCGA-86-8358-01 | 11.3219 | 653  | LIVING   |
| TCGA-44-7667-01 | 11.3153 | 1097 | LIVING   |
| TCGA-86-8054-01 | 12.4626 | 1148 | LIVING   |
| TCGA-05-4427-01 | 11.1261 | 791  | LIVING   |
| TCGA-50-5933-01 | 11.6229 | 2393 | DECEASED |
| TCGA-50-6595-01 | 11.4434 | 189  | DECEASED |
| TCGA-97-8172-01 | 11.0465 | 545  | LIVING   |
| TCGA-50-5931-01 | 12.9407 | 434  | DECEASED |
| TCGA-50-5045-01 | 11.1197 | 2174 | DECEASED |
| TCGA-86-8073-01 | 10.939  | 740  | LIVING   |
| TCGA-05-4390-01 | 11.4768 | 1126 | LIVING   |
| TCGA-44-7669-01 | 13.4378 | 574  | DECEASED |
| TCGA-55-1592-01 | 11.5427 | 701  | DECEASED |
| TCGA-86-8075-01 | 11.2657 | 694  | DECEASED |
| TCGA-86-7701-01 | 12.0542 | 947  | LIVING   |
| TCGA-86-7711-01 | 12.3856 | 1046 | DECEASED |
| TCGA-44-6777-01 | 11.4283 | 987  | DECEASED |
| TCGA-86-6562-01 | 11.097  | 376  | DECEASED |
| TCGA-50-5946-02 | 11.4729 | 1617 | LIVING   |
| TCGA-97-8171-01 | 12.412  | 568  | LIVING   |
| TCGA-75-6214-01 | 12.3083 | 1115 | DECEASED |
| TCGA-44-2666-01 | 10.8329 | 97   | DECEASED |
| TCGA-71-6725-01 | 11.2897 | 256  | LIVING   |
| TCGA-44-4112-01 | 12.4661 | 808  | DECEASED |
| TCGA-50-6592-01 | 12.2074 | 777  | DECEASED |
| TCGA-49-4488-01 | 11.4085 | 869  | DECEASED |
| TCGA-50-6597-01 | 11.1649 | 1268 | DECEASED |
| TCGA-86-7955-01 | 12.2495 | 1072 | LIVING   |
| TCGA-97-8176-01 | 12.1561 | 468  | DECEASED |
| TCGA-49-6744-01 | 10.8666 | 1683 | LIVING   |
| TCGA-49-6742-01 | 11.4893 | 488  | DECEASED |
| TCGA-86-8585-01 | 11.4648 | 353  | LIVING   |
| TCGA-86-8672-01 | 11.4551 | 19   | DECEASED |
| TCGA-86-8669-01 | 11.6628 | 938  | LIVING   |
| TCGA-49-4512-01 | 11.5949 | 905  | DECEASED |
| TCGA-86-8074-01 | 11.0406 | 24   | LIVING   |
| TCGA-49-6761-01 | 11.9505 | 354  | LIVING   |
| TCGA-86-8674-01 | 11.3759 | 806  | LIVING   |
| TCGA-86-8359-01 | 10.9346 | 444  | DECEASED |
| TCGA-49-4494-01 | 11.697  | 1081 | DECEASED |
| TCGA-75-6212-01 | 11.3523 | 1516 | DECEASED |
| TCGA-44-8119-01 | 10.8792 | 285  | LIVING   |
| TCGA-86-8673-01 | 11.8137 | 862  | LIVING   |
| TCGA-91-7771-01 | 11.2383 | 492  | LIVING   |
| TCGA-86-7713-01 | 11.4989 | 1157 | LIVING   |
| TCGA-86-8055-01 | 11.1726 | 124  | DECEASED |
| TCGA-49-AARO-01 | 10.9222 | 3759 | LIVING   |
| TCGA-L9-A5IP-01 | 11.6507 | 58   | DECEASED |
| TCGA-53-7624-01 | 12.8053 | 1043 | DECEASED |
| TCGA-73-A9RS-01 | 12.627  | 340  | DECEASED |
| TCGA-L4-A4E5-01 | 11.6786 | 578  | LIVING   |
| TCGA-86-A4D0-01 | 12.005  | 116  | DECEASED |
| TCGA-NJ-A4YF-01 | 12.0969 | 2161 | LIVING   |
| TCGA-4B-A93V-01 | 10.8592 | 300  | DECEASED |
| TCGA-NJ-A4YP-01 | 11.4878 | 50   | LIVING   |
| TCGA-78-8662-01 | 11.505  | 3361 | DECEASED |
| TCGA-62-A46R-01 | 10.8756 | 1725 | DECEASED |
| TCGA-55-A493-01 | 12.6154 | 28   | LIVING   |
| TCGA-MP-A4TK-01 | 10.9093 | 582  | DECEASED |
| TCGA-49-AARN-01 | 10.9206 | 1135 | DECEASED |
| TCGA-NJ-A550-01 | 11.3767 | 13   | LIVING   |
| TCGA-86-A4JF-01 | 12.06   | 737  | DECEASED |

|                 |         |      |          |
|-----------------|---------|------|----------|
| TCGA-MP-A4TE-01 | 12.152  | 896  | DECEASED |
| TCGA-MN-A4N4-01 | 11.0366 | 1175 | LIVING   |
| TCGA-49-AARO-01 | 11.2813 | 4765 | LIVING   |
| TCGA-35-3615-01 | 11.5387 | 14   | LIVING   |
| TCGA-MP-A4TF-01 | 11.9981 | 336  | DECEASED |
| TCGA-L9-A444-01 | 10.9709 | 307  | LIVING   |
| TCGA-69-A59K-01 | 11.2686 | 522  | LIVING   |
| TCGA-44-3918-01 | 11.304  | 1036 | LIVING   |
| TCGA-MN-A4N1-01 | 11.6696 | 827  | LIVING   |
| TCGA-97-A4M0-01 | 12.0542 | 652  | LIVING   |
| TCGA-J2-A4AD-01 | 11.3252 | 550  | DECEASED |
| TCGA-MP-A4SY-01 | 11.5263 | 1501 | DECEASED |
| TCGA-49-AAR9-01 | 11.7814 | 260  | DECEASED |
| TCGA-55-A494-01 | 12.5351 | 481  | LIVING   |
| TCGA-95-A4VN-01 | 11.524  | 553  | LIVING   |
| TCGA-L9-A443-01 | 11.7397 | 193  | DECEASED |
| TCGA-44-6146-01 | 11.1825 | 728  | LIVING   |
| TCGA-L9-A8F4-01 | 11.5251 | 476  | LIVING   |
| TCGA-62-A471-01 | 12.1773 | 1246 | LIVING   |
| TCGA-NJ-A4YG-01 | 11.3173 | 2261 | LIVING   |
| TCGA-62-A46O-01 | 11.3354 | 1454 | DECEASED |
| TCGA-95-A4VP-01 | 10.9311 | 605  | LIVING   |
| TCGA-J2-A4AG-01 | 11.1696 | 988  | LIVING   |
| TCGA-44-A4SU-01 | 10.9362 | 409  | DECEASED |
| TCGA-NJ-A55R-01 | 11.7263 | 603  | LIVING   |
| TCGA-MP-A4SV-01 | 11.9115 | 2620 | DECEASED |
| TCGA-MP-A4T4-01 | 11.1811 | 2617 | DECEASED |
| TCGA-MP-A4T8-01 | 11.9794 | 161  | DECEASED |
| TCGA-NJ-A4YQ-01 | 11.1037 | 1432 | LIVING   |
| TCGA-55-A48Y-01 | 11.7965 | 630  | LIVING   |
| TCGA-93-A4JO-01 | 10.8503 | 33   | DECEASED |
| TCGA-55-A492-01 | 11.5896 | 596  | LIVING   |
| TCGA-62-A472-01 | 12.4874 | 910  | LIVING   |
| TCGA-MP-A4TD-01 | 10.8668 | 307  | DECEASED |
| TCGA-62-A46U-01 | 11.1979 | 2067 | LIVING   |
| TCGA-MP-A4TL-01 | 11.5354 | 429  | DECEASED |
| TCGA-44-A4SS-01 | 11.8137 | 415  | LIVING   |
| TCGA-L9-A50W-01 | 10.9014 | 442  | DECEASED |
| TCGA-MP-A4T7-01 | 11.748  | 167  | DECEASED |
| TCGA-MP-A4TA-01 | 12.5008 | 950  | DECEASED |
| TCGA-91-A4BD-01 | 11.1776 | 603  | LIVING   |
| TCGA-44-A47A-01 | 11.2156 | 466  | LIVING   |
| TCGA-86-A456-01 | 11.4031 | 896  | LIVING   |
| TCGA-55-A490-01 | 12.2943 | 99   | DECEASED |
| TCGA-38-A44F-01 | 11.3063 | 133  | LIVING   |
| TCGA-55-A491-01 | 10.8431 | 626  | LIVING   |
| TCGA-NJ-A4Y1-01 | 11.4066 | 4    | DECEASED |
| TCGA-55-A4DF-01 | 11.1885 | 614  | DECEASED |

### Low Expression of FKBP4

| sampleID        | FKBP4 expression | _OS ( days ) | vital_status |
|-----------------|------------------|--------------|--------------|
| TCGA-55-7283-01 | 10.4267          | 609          | LIVING       |
| TCGA-55-8089-01 | 10.8046          | 702          | DECEASED     |
| TCGA-55-7816-01 | 10.5104          | 468          | DECEASED     |
| TCGA-55-7281-01 | 10.7071          | 872          | LIVING       |
| TCGA-55-7914-01 | 10.4826          | 187          | DECEASED     |
| TCGA-55-8097-01 | 10.3047          | 476          | LIVING       |
| TCGA-44-2655-01 | 10.59            | 1324         | LIVING       |
| TCGA-55-8514-01 | 10.4442          | 520          | LIVING       |
| TCGA-67-3774-01 | 9.8111           | 385          | LIVING       |
| TCGA-55-7227-01 | 10.3214          | 952          | DECEASED     |
| TCGA-55-6982-01 | 10.5347          | 995          | DECEASED     |
| TCGA-55-6983-01 | 10.5967          | 2823         | LIVING       |
| TCGA-67-6215-01 | 10.3513          | 174          | LIVING       |
| TCGA-55-7727-01 | 10.653           | 119          | LIVING       |
| TCGA-44-3919-01 | 10.4603          | 1026         | DECEASED     |
| TCGA-75-7030-01 | 10.1276          |              | LIVING       |
| TCGA-75-7025-01 | 10.3907          | 3305         | LIVING       |
| TCGA-91-6840-01 | 10.6176          | 372          | LIVING       |
| TCGA-55-6968-01 | 10.7639          | 1293         | DECEASED     |
| TCGA-97-7547-01 | 10.5419          | 1965         | LIVING       |
| TCGA-62-8402-01 | 10.8001          | 1498         | DECEASED     |
| TCGA-55-8621-01 | 10.5898          | 515          | LIVING       |
| TCGA-55-8092-01 | 10.7161          | 154          | DECEASED     |
| TCGA-55-7815-01 | 10.1816          | 773          | LIVING       |
| TCGA-75-6206-01 | 10.818           | 2590         | LIVING       |
| TCGA-53-7813-01 | 10.5192          | 424          | LIVING       |
| TCGA-95-7039-01 | 10.599           | 1272         | LIVING       |
| TCGA-69-7974-01 | 10.6056          | 184          | LIVING       |
| TCGA-44-2656-01 | 10.7041          | 1429         | LIVING       |
| TCGA-64-1681-01 | 10.6966          | 1167         | DECEASED     |
| TCGA-73-4662-01 | 10.6626          | 2515         | LIVING       |
| TCGA-05-4384-01 | 10.6292          | 426          | LIVING       |
| TCGA-75-5122-01 | 10.0424          |              | DECEASED     |
| TCGA-75-5146-01 | 10.6753          | 2368         | LIVING       |
| TCGA-69-7973-01 | 9.9935           | 230          | LIVING       |
| TCGA-55-7910-01 | 10.8227          | 1040         | LIVING       |
| TCGA-49-4510-01 | 9.5563           | 896          | DECEASED     |
| TCGA-55-6969-01 | 10.6512          | 1239         | LIVING       |
| TCGA-55-8206-01 | 9.7651           | 888          | LIVING       |
| TCGA-55-8087-01 | 9.5642           | 462          | LIVING       |

|                 |         |      |          |
|-----------------|---------|------|----------|
| TCGA-71-8520-01 | 10.1688 | 210  | DECEASED |
| TCGA-55-7574-01 | 10.3667 | 995  | DECEASED |
| TCGA-05-4397-01 | 10.7099 | 731  | DECEASED |
| TCGA-78-7147-01 | 10.5378 | 586  | DECEASED |
| TCGA-69-7763-01 | 10.5209 | 690  | LIVING   |
| TCGA-67-3770-01 | 10.6604 | 610  | LIVING   |
| TCGA-78-7537-01 | 9.7448  | 1622 | DECEASED |
| TCGA-55-7573-01 | 10.1183 | 487  | LIVING   |
| TCGA-86-8671-01 | 10.2473 | 839  | LIVING   |
| TCGA-95-8039-01 | 10.4315 | 830  | LIVING   |
| TCGA-55-8207-01 | 10.2719 | 977  | LIVING   |
| TCGA-55-7284-01 | 10.8042 | 243  | DECEASED |
| TCGA-78-7539-01 | 10.7659 | 791  | LIVING   |
| TCGA-67-3772-01 | 10.3319 | 573  | LIVING   |
| TCGA-55-8512-01 | 10.1391 | 607  | DECEASED |
| TCGA-55-8507-01 | 10.408  | 418  | LIVING   |
| TCGA-38-4626-01 | 10.3518 | 3674 | LIVING   |
| TCGA-44-8120-01 | 10.1809 | 260  | LIVING   |
| TCGA-73-7498-01 | 10.596  | 1189 | LIVING   |
| TCGA-55-6979-01 | 10.1375 | 237  | DECEASED |
| TCGA-44-6778-01 | 10.725  | 1864 | LIVING   |
| TCGA-55-6642-01 | 9.8736  | 2449 | LIVING   |
| TCGA-55-7728-01 | 9.7643  | 704  | LIVING   |
| TCGA-78-7153-01 | 9.9291  | 3635 | LIVING   |
| TCGA-12-8192-01 | 10.7971 | 739  | LIVING   |
| TCGA-05-4432-01 | 9.8741  | 761  | LIVING   |
| TCGA-50-5942-01 | 9.5525  | 1847 | LIVING   |
| TCGA-44-6147-01 | 10.2502 | 845  | LIVING   |
| TCGA-78-7633-01 | 10.5791 | 1528 | DECEASED |
| TCGA-78-7161-01 | 10.5837 | 291  | DECEASED |
| TCGA-44-2657-01 | 10.1708 | 1351 | LIVING   |
| TCGA-93-7347-01 | 10.8257 | 683  | LIVING   |
| TCGA-55-8090-01 | 9.8921  | 598  | DECEASED |
| TCGA-75-6203-01 | 10.5727 |      | LIVING   |
| TCGA-44-8117-01 | 10.2288 | 385  | LIVING   |
| TCGA-55-6971-01 | 10.3412 | 1400 | LIVING   |
| TCGA-78-7159-01 | 9.7472  | 1974 | LIVING   |
| TCGA-91-6847-01 | 10.8106 | 842  | LIVING   |
| TCGA-05-4425-01 | 10.177  | 669  | LIVING   |
| TCGA-38-7271-01 | 10.6711 | 800  | DECEASED |
| TCGA-67-6217-01 | 10.4567 | 422  | LIVING   |
| TCGA-91-6835-01 | 10.1634 | 79   | LIVING   |
| TCGA-78-7535-01 | 10.4525 | 949  | DECEASED |
| TCGA-55-8510-01 | 10.2779 | 539  | LIVING   |
| TCGA-67-6216-01 | 10.0926 | 141  | LIVING   |
| TCGA-69-8253-01 | 10.7278 | 426  | LIVING   |
| TCGA-64-5778-01 | 10.4945 | 1305 | LIVING   |
| TCGA-78-7163-01 | 10.7862 | 7248 | LIVING   |
| TCGA-50-8457-01 | 10.7032 | 1125 | LIVING   |
| TCGA-64-1680-01 | 10.7158 | 1126 | LIVING   |
| TCGA-50-8459-01 | 9.8415  | 1119 | LIVING   |
| TCGA-55-8619-01 | 10.3376 | 416  | LIVING   |
| TCGA-97-7938-01 | 9.7866  | 18   | DECEASED |
| TCGA-97-7546-01 | 10.1956 | 1285 | LIVING   |
| TCGA-05-4250-01 | 10.4736 | 121  | DECEASED |
| TCGA-49-6743-01 | 10.7581 | 1621 | LIVING   |
| TCGA-50-5939-01 | 10.5247 | 460  | DECEASED |
| TCGA-80-5611-01 | 9.8837  | 2595 | LIVING   |
| TCGA-80-5608-01 | 10.4633 | 2832 | LIVING   |
| TCGA-99-8028-01 | 10.7136 | 1118 | LIVING   |
| TCGA-50-7109-01 | 10.223  | 308  | DECEASED |
| TCGA-44-5645-01 | 9.693   | 852  | LIVING   |
| TCGA-64-5779-01 | 10.8076 | 864  | LIVING   |
| TCGA-97-7941-01 | 10.8319 | 484  | LIVING   |
| TCGA-44-3396-01 | 10.2453 | 1130 | LIVING   |
| TCGA-50-8460-01 | 10.8085 | 829  | LIVING   |
| TCGA-50-6593-01 | 10.4245 | 336  | DECEASED |
| TCGA-50-5068-01 | 9.9935  | 1499 | DECEASED |
| TCGA-64-5774-01 | 10.5636 | 2676 | LIVING   |
| TCGA-86-8056-01 | 9.0954  | 139  | LIVING   |
| TCGA-38-4627-01 | 10.4958 | 1147 | DECEASED |
| TCGA-05-4249-01 | 9.9528  | 1523 | LIVING   |
| TCGA-69-8254-01 | 9.3813  | 409  | LIVING   |
| TCGA-50-5935-01 | 9.9359  | 653  | DECEASED |
| TCGA-44-7672-01 | 10.2697 | 719  | LIVING   |
| TCGA-44-6774-01 | 10.7375 | 658  | LIVING   |
| TCGA-97-7553-01 | 10.4123 | 1870 | LIVING   |
| TCGA-44-6148-01 | 10.4409 | 704  | LIVING   |
| TCGA-86-7714-01 | 10.1632 | 625  | DECEASED |
| TCGA-44-2661-01 | 9.7086  | 1159 | LIVING   |
| TCGA-91-6828-01 | 10.3553 | 323  | LIVING   |
| TCGA-38-6178-01 | 10.8054 | 448  | LIVING   |
| TCGA-05-4426-01 | 9.5751  | 791  | LIVING   |
| TCGA-93-7348-01 | 10.3252 | 531  | LIVING   |
| TCGA-97-8552-01 | 10.1315 | 626  | LIVING   |
| TCGA-44-3398-01 | 9.9163  | 1163 | LIVING   |
| TCGA-97-7554-01 | 10.4483 | 775  | LIVING   |
| TCGA-86-8279-01 | 10.825  | 949  | LIVING   |
| TCGA-91-8497-01 | 9.843   | 434  | DECEASED |
| TCGA-83-5908-01 | 10.0204 | 824  | LIVING   |
| TCGA-97-8547-01 | 10.3831 | 657  | LIVING   |
| TCGA-50-5055-01 | 10.3726 | 1830 | DECEASED |

|                 |         |      |          |
|-----------------|---------|------|----------|
| TCGA-97-8175-01 | 10.5652 | 551  | LIVING   |
| TCGA-86-8668-01 | 10.4058 | 423  | LIVING   |
| TCGA-91-8496-01 | 10.5079 | 505  | LIVING   |
| TCGA-86-8278-01 | 10.7799 | 944  | LIVING   |
| TCGA-55-1594-01 | 10.5475 | 1178 | LIVING   |
| TCGA-50-5049-01 | 10.8049 | 3094 | LIVING   |
| TCGA-97-7552-01 | 10.788  | 1932 | LIVING   |
| TCGA-73-7499-01 | 10.3991 | 1531 | DECEASED |
| TCGA-97-8177-01 | 10.3831 | 499  | LIVING   |
| TCGA-86-8280-01 | 10.7516 | 701  | LIVING   |
| TCGA-86-7953-01 | 10.4144 | 997  | LIVING   |
| TCGA-49-AARQ-01 | 9.9145  | 6732 | LIVING   |
| TCGA-97-A4M6-01 | 10.0715 | 568  | LIVING   |
| TCGA-NJ-A7XG-01 | 10.6632 | 617  | LIVING   |
| TCGA-93-A4JQ-01 | 10.7881 | 526  | LIVING   |
| TCGA-49-AAR4-01 | 10.0459 | 879  | DECEASED |
| TCGA-49-AARE-01 | 10.5034 | 1229 | DECEASED |
| TCGA-97-A4M1-01 | 10.2565 | 601  | LIVING   |
| TCGA-MP-A4SW-01 | 10.5991 | 1778 | DECEASED |
| TCGA-MP-A4T9-01 | 9.9388  | 1265 | DECEASED |
| TCGA-44-2665-01 | 10.7543 | 1301 | LIVING   |
| TCGA-L9-A743-01 | 9.9686  | 664  | LIVING   |
| TCGA-86-A4P8-01 | 9.8474  | 805  | LIVING   |
| TCGA-91-A4BC-01 | 10.5155 | 44   | LIVING   |
| TCGA-55-A48Z-01 | 10.3415 | 651  | LIVING   |
| TCGA-MP-A4TJ-01 | 10.0143 | 339  | DECEASED |
| TCGA-55-A48X-01 | 9.9616  | 689  | LIVING   |
| TCGA-86-A4P7-01 | 10.0878 | 415  | LIVING   |
| TCGA-MN-A4N5-01 | 10.0994 | 84   | LIVING   |
| TCGA-53-A4EZ-01 | 10.2047 | 1071 | LIVING   |
| TCGA-49-AAQV-01 | 10.5385 | 677  | DECEASED |
| TCGA-49-AAR2-01 | 8.8515  | 2224 | LIVING   |
| TCGA-93-A4JP-01 | 10.1209 | 578  | LIVING   |
| TCGA-62-A46P-01 | 7.9563  | 594  | DECEASED |
| TCGA-97-A4M2-01 | 10.7063 | 624  | LIVING   |
| TCGA-L4-A4E6-01 | 10.3866 | 435  | LIVING   |
| TCGA-S2-AA1A-01 | 9.49    | 513  | LIVING   |
| TCGA-49-AARR-01 | 10.6329 | 4992 | LIVING   |
| TCGA-L9-A7SV-01 | 10.3148 | 565  | LIVING   |
| TCGA-97-A4M3-01 | 10.513  | 540  | LIVING   |
| TCGA-49-AAR3-01 | 10.7925 | 1893 | LIVING   |
| TCGA-99-AA5R-01 | 10.0611 | 658  | LIVING   |
| TCGA-MP-A4TH-01 | 10.0717 | 741  | LIVING   |
| TCGA-62-A46Y-01 | 10.5178 | 414  | DECEASED |
| TCGA-93-A4JN-01 | 9.4211  | 718  | LIVING   |
| TCGA-55-A4DG-01 | 10.2056 | 608  | LIVING   |
| TCGA-44-6775-01 | 9.9939  | 705  | LIVING   |
| TCGA-62-A46S-01 | 8.4738  | 1653 | DECEASED |
| TCGA-44-A479-01 | 8.598   | 486  | LIVING   |
| TCGA-44-A47G-01 | 10.0249 | 351  | LIVING   |
| TCGA-97-A4M7-01 | 9.4935  | 629  | LIVING   |
| TCGA-O1-A52J-01 | 10.1313 | 1798 | DECEASED |
| TCGA-95-A4VK-01 | 10.4635 | 651  | LIVING   |
| TCGA-MP-A5C7-01 | 10.3026 | 2248 | LIVING   |
| TCGA-MP-A4T6-01 | 10.3116 | 1790 | DECEASED |
| TCGA-NJ-A55A-01 | 10.5677 | 15   | LIVING   |
| TCGA-53-7626-01 | 10.5781 | 929  | DECEASED |
| TCGA-67-3771-01 | 9.9     | 610  | LIVING   |
| TCGA-J2-A4AE-01 | 10.1614 | 1079 | LIVING   |
| TCGA-MP-A4TC-01 | 10.788  | 74   | DECEASED |
| TCGA-62-A46V-01 | 10.5652 | 2199 | LIVING   |
| TCGA-44-A47B-01 | 9.356   | 287  | LIVING   |
| TCGA-55-A57B-01 | 10.2954 | 546  | LIVING   |
| TCGA-97-A4LX-01 | 10.723  | 614  | LIVING   |
| TCGA-97-A4M5-01 | 10.617  | 634  | LIVING   |
| TCGA-62-A470-01 | 9.2628  | 1194 | DECEASED |



**Table S2****Positive regulation of I-kappaB kinase/NF-kappaB signaling and NF-kappaB transcription factor activity**

| ID              | gene_name | gene_chr | gene_strand | gene_biotype   | NCD_1_fpkm  | NCD_2_fpkm  | NCD_3_fpkm  | D52_1_fpkm  | D52_2_fpkm  | D52_3_fpkm  | D52vsNCD_log2<br>FoldChange | D52vsNCD_<br>FoldChange | D52vsNCD_pvalu<br>e | D52vsNCD_padj |
|-----------------|-----------|----------|-------------|----------------|-------------|-------------|-------------|-------------|-------------|-------------|-----------------------------|-------------------------|---------------------|---------------|
| ENSG00000167191 | GPRC5B    | 16       | -           | protein_coding | 5.317987505 | 4.959059636 | 8.129506027 | 2.166708547 | 1.872813864 | 2.289767667 | -1.540607028                | 0.343740792             | 3.75E-12            | 2.27E-10      |
| ENSG00000184304 | PRKD1     | 14       | -           | protein_coding | 2.186765711 | 2.373484399 | 2.438120409 | 1.076385029 | 0.828819951 | 0.779524873 | -1.384593092                | 0.382997507             | 1.06E-11            | 5.91E-10      |
| ENSG00000181104 | F2R       | 5        | +           | protein_coding | 6.035448875 | 5.584950427 | 6.605711275 | 2.81167865  | 3.034067019 | 3.876288905 | -0.906659092                | 0.533418922             | 6.64E-07            | 1.43E-05      |
| ENSG00000097007 | ABL1      | 9        | +           | protein_coding | 41.76164488 | 40.09235279 | 43.98592983 | 29.32191617 | 28.13879906 | 28.43304199 | -0.551031162                | 0.682532116             | 1.01E-06            | 2.08E-05      |
| ENSG00000119401 | TRIM32    | 9        | +           | protein_coding | 17.24003451 | 16.75659484 | 17.46107016 | 11.91009593 | 11.25457414 | 10.1183124  | -0.628814417                | 0.646707651             | 1.68E-06            | 3.27E-05      |
| ENSG00000172936 | MYD88     | 3        | +           | protein_coding | 9.585662466 | 9.378872    | 9.108469049 | 6.309539317 | 6.353956857 | 5.937013079 | -0.593884192                | 0.662556691             | 4.67E-06            | 8.22E-05      |
| ENSG00000137752 | CASP1     | 11       | -           | protein_coding | 0.906676439 | 0.741122224 | 1.08566025  | 0.191719562 | 0.171854385 | 0.457443119 | -1.738059468                | 0.299772622             | 2.58E-05            | 0.000370532   |
| ENSG00000198121 | LPAR1     | 9        | -           | protein_coding | 0.274443179 | 0.219657769 | 0.598499254 | 0           | 0.026965653 | 0.099204467 | -3.106937787                | 0.116069612             | 6.33E-05            | 0.000806103   |
| ENSG00000100614 | PPM1A     | 14       | +           | protein_coding | 9.497708145 | 9.569859989 | 9.24480713  | 6.702720366 | 6.7233353   | 7.201215473 | -0.456877652                | 0.72856134              | 7.13E-05            | 0.000892297   |
| ENSG00000121858 | TNFSF10   | 3        | -           | protein_coding | 0.092433439 | 0.225467482 | 0.508637923 | 0           | 0           | 0.047519882 | -4.126686525                | 0.057245793             | 0.000159918         | 0.001772026   |
| ENSG00000116729 | WLS       | 1        | -           | protein_coding | 13.64027391 | 13.85194439 | 12.95435367 | 9.796251843 | 10.18862406 | 8.161351069 | -0.522903786                | 0.695969609             | 0.000298111         | 0.002973226   |
| ENSG00000129353 | SLC44A2   | 19       | +           | protein_coding | 13.15022201 | 11.69301818 | 17.07201576 | 7.339889323 | 7.919600956 | 10.27523393 | -0.715024466                | 0.609194801             | 0.000398782         | 0.003779429   |
| ENSG00000132256 | TRIM5     | 11       | -           | protein_coding | 6.764049258 | 6.474693834 | 7.671857482 | 4.215281213 | 4.816884739 | 5.230394462 | -0.551632496                | 0.682247687             | 0.00048633          | 0.004464907   |
| ENSG00000102471 | NDFIP2    | 13       | +           | protein_coding | 5.992455342 | 5.853787176 | 6.0133143   | 4.152509805 | 4.70099414  | 4.172179546 | -0.454726307                | 0.729648581             | 0.001059542         | 0.008493234   |
| ENSG00000112343 | TRIM38    | 6        | +           | protein_coding | 2.652536472 | 2.430937982 | 2.844845067 | 1.562871878 | 1.838787473 | 2.060107811 | -0.537295987                | 0.689061192             | 0.00150752          | 0.011427598   |
| ENSG00000128284 | APOL3     | 22       | -           | protein_coding | 1.021533171 | 1.039464572 | 1.306280543 | 0.548164109 | 0.658849664 | 0.783091586 | -0.757046316                | 0.591706514             | 0.001563072         | 0.011771448   |
| ENSG00000003400 | CASP10    | 2        | +           | protein_coding | 1.41774798  | 1.540171861 | 1.785986842 | 1.026423839 | 1.0725951   | 1.091482854 | -0.571278868                | 0.67301993              | 0.001581386         | 0.011899672   |
| ENSG00000145632 | PLK2      | 5        | -           | protein_coding | 21.84429274 | 21.05793358 | 20.99166446 | 17.42522429 | 16.64532777 | 15.68851029 | -0.360874062                | 0.778692663             | 0.002342082         | 0.016364467   |
| ENSG00000174130 | TLR6      | 4        | -           | protein_coding | 1.737646538 | 1.946268186 | 1.742949728 | 0.844372183 | 1.108802919 | 1.43569494  | -0.677564275                | 0.625219953             | 0.003184209         | 0.020934675   |
| ENSG00000019582 | CD74      | 5        | -           | protein_coding | 2.307732916 | 2.500312111 | 3.480141216 | 1.739603631 | 1.620259705 | 2.034448698 | -0.619599694                | 0.650851495             | 0.008308503         | 0.044989583   |
| ENSG00000136869 | TLR4      | 9        | +           | protein_coding | 2.805792235 | 2.828724269 | 3.049193625 | 0.594288027 | 0.68446068  | 0.705682965 | -2.128243466                | 0.228736188             | 5.33E-44            | 4.29E-41      |
| ENSG00000114251 | WNT5A     | 3        | -           | protein_coding | 0.694381684 | 0.729259777 | 1.118078885 | 0.06589469  | 0.040430859 | 0.078089486 | -3.795723726                | 0.072006765             | 1.33E-22            | 2.74E-20      |
| ENSG00000164342 | TLR3      | 4        | +           | protein_coding | 1.230698478 | 1.242194831 | 1.152366032 | 0.369040197 | 0.472574001 | 0.368166014 | -1.579275959                | 0.334649796             | 1.37E-12            | 8.73E-11      |
| ENSG00000120885 | CLU       | 8        | -           | protein_coding | 8.626127429 | 8.672923044 | 14.23010795 | 3.589902427 | 3.384620105 | 3.953792842 | -1.528700853                | 0.34658933              | 5.39E-12            | 3.22E-10      |
| ENSG00000104899 | AMH       | 19       | +           | protein_coding | 13.74643595 | 15.55469493 | 12.10483901 | 6.474537083 | 7.051832651 | 4.194492955 | -1.223808376                | 0.428151007             | 2.87E-08            | 8.38E-07      |
| ENSG00000120337 | TNFSF18   | 1        | -           | protein_coding | 0.746065513 | 0.953246374 | 1.11965742  | 0.044134645 | 0.037234446 | 0.287663312 | -2.93710152                 | 0.130570282             | 4.96E-06            | 8.69E-05      |
| ENSG00000167632 | TRAPPC9   | 8        | -           | protein_coding | 0.903433686 | 0.921953181 | 1.128934019 | 0.650489826 | 0.699513324 | 0.652604994 | -0.559918307                | 0.678340574             | 0.003764366         | 0.023964602   |

**Negative regulation of I-kappaB kinase/NF-kappaB signaling and NF-kappaB transcription factor activity**

| ID              | gene_name | gene_chr | gene_strand | gene_biotype   | NCD_1_fpkm  | NCD_2_fpkm  | NCD_3_fpkm  | D52_1_fpkm  | D52_2_fpkm  | D52_3_fpkm  | D52vsNCD_log2<br>FoldChange | D52vsNCD_<br>FoldChange | D52vsNCD_pvalu<br>e | D52vsNCD_padj |
|-----------------|-----------|----------|-------------|----------------|-------------|-------------|-------------|-------------|-------------|-------------|-----------------------------|-------------------------|---------------------|---------------|
| ENSG00000136848 | DAB2IP    | 9        | +           | protein_coding | 6.90948365  | 6.372642427 | 7.196413222 | 14.19589143 | 13.7622623  | 13.93688202 | 1.032425566                 | 2.045460342             | 9.16E-18            | 1.11E-15      |
| ENSG00000101782 | RIOK3     | 18       | +           | protein_coding | 10.67389225 | 11.20276249 | 11.62925384 | 17.10811491 | 18.95871583 | 17.8453527  | 0.686517875                 | 1.609394352             | 2.34E-08            | 6.98E-07      |
| ENSG00000145901 | TNIP1     | 5        | -           | protein_coding | 40.84113963 | 40.07835319 | 36.00334627 | 56.65681643 | 55.63303085 | 52.35558828 | 0.493774953                 | 1.408124555             | 4.50E-05            | 0.000598737   |
| ENSG00000123240 | OPTN      | 10       | +           | protein_coding | 16.45302014 | 16.76437181 | 20.49580756 | 24.24265032 | 26.24403731 | 35.95920974 | 0.686567504                 | 1.609449717             | 0.000323308         | 0.00316979    |
| ENSG00000091592 | NLRP1     | 17       | -           | protein_coding | 1.033198993 | 1.16840476  | 1.504598978 | 1.688308685 | 1.926376718 | 3.95904751  | 1.031322717                 | 2.043897314             | 0.00087837          | 0.007256667   |
| ENSG00000165233 | CARD19    | 9        | +           | protein_coding | 5.939050938 | 5.930260702 | 11.44099146 | 13.31780464 | 14.77863061 | 13.88696074 | 0.849047921                 | 1.801311792             | 0.000979491         | 0.007951019   |
| ENSG00000137802 | MAPKBP1   | 15       | +           | protein_coding | 1.684093758 | 1.646524831 | 1.810271642 | 2.276098264 | 2.270362858 | 2.414119686 | 0.437057255                 | 1.353840007             | 0.001976017         | 0.014276301   |
| ENSG00000101997 | CCDC22    | X        | +           | protein_coding | 12.19211914 | 11.0139979  | 9.797574587 | 20.20068668 | 16.37380303 | 12.52860945 | 0.572632751                 | 1.487235127             | 0.005121947         | 0.030521924   |
| ENSG00000141480 | ARRB2     | 17       | +           | protein_coding | 4.715622905 | 4.616937773 | 5.647494368 | 11.00684938 | 11.33814417 | 10.26759883 | 1.122472248                 | 2.177197445             | 5.51E-14            | 4.43E-12      |
| ENSG00000083799 | CYLD      | 16       | +           | protein_coding | 6.283521866 | 5.658641839 | 5.832793085 | 8.79450774  | 9.026958706 | 9.408637752 | 0.615133243                 | 1.531699454             | 3.07E-07            | 7.06E-06      |
| ENSG00000106052 | TAX1BP1   | 7        | +           | protein_coding | 9.239311909 | 9.227413552 | 8.235428936 | 12.84129884 | 14.37006665 | 14.85599074 | 0.655828155                 | 1.575520094             | 6.77E-07            | 1.45E-05      |
| ENSG00000204498 | NFKBIL1   | 6        | +           | protein_coding | 9.122772231 | 8.094093922 | 10.17797636 | 15.24364498 | 13.8900598  | 13.75304598 | 0.645705628                 | 1.564504305             | 4.84E-05            | 0.000637755   |
| ENSG00000134070 | IRAK2     | 3        | +           | protein_coding | 21.72093807 | 19.88409287 | 17.08266299 | 27.11086203 | 25.02958655 | 31.58106854 | 0.512289686                 | 1.426312085             | 0.001416035         | 0.010849808   |
| ENSG00000149600 | COMMD7    | 20       | -           | protein_coding | 3.616597397 | 3.636448452 | 3.029723155 | 4.647186834 | 5.049071511 | 4.981753496 | 0.513800821                 | 1.427806843             | 0.003084552         | 0.020421076   |

**Table S3**

| Gene Name | BioID  |     | log2 (Fold Change) | z score | p value  | Signature p value |
|-----------|--------|-----|--------------------|---------|----------|-------------------|
|           | FKBP4  | CON |                    |         |          |                   |
| FLNA      | 26.026 | 0   | 5.702              | 5.995   | 2.03E-09 | TRUE              |
| FKBP4     | 22.937 | 0   | 5.520              | 5.642   | 1.68E-08 | TRUE              |
| BTF3L4    | 20.438 | 0   | 5.353              | 5.333   | 9.63E-08 | TRUE              |
| ANXA2     | 19.524 | 0   | 5.287              | 5.215   | 1.84E-07 | TRUE              |
| SIM2      | 19.434 | 0   | 5.280              | 5.203   | 1.96E-07 | TRUE              |
| HSP90AA1  | 19.338 | 0   | 5.273              | 5.190   | 2.10E-07 | TRUE              |
| MYOF      | 18.379 | 0   | 5.200              | 5.061   | 4.17E-07 | TRUE              |
| SHROOM3   | 17.951 | 0   | 5.166              | 5.002   | 5.67E-07 | TRUE              |
| HSP90AB1  | 17.853 | 0   | 5.158              | 4.988   | 6.09E-07 | TRUE              |
| HSP90AB3P | 17.853 | 0   | 5.158              | 4.988   | 6.09E-07 | TRUE              |
| PRRC2C    | 30.721 | 0   | 5.941              | 4.889   | 1.01E-06 | TRUE              |
| IGKV3D-11 | 16.787 | 0   | 5.069              | 4.837   | 1.32E-06 | TRUE              |
| IGKV3-11  | 16.787 | 0   | 5.069              | 4.837   | 1.32E-06 | TRUE              |
| DNAJC11   | 16.692 | 0   | 5.061              | 4.823   | 1.41E-06 | TRUE              |
| ALG10     | 29.698 | 0   | 5.892              | 4.799   | 1.59E-06 | TRUE              |
| ALG10B    | 29.698 | 0   | 5.892              | 4.799   | 1.59E-06 | TRUE              |
| TJP2      | 29.648 | 0   | 5.890              | 4.795   | 1.63E-06 | TRUE              |
| KCNK10    | 28.550 | 0   | 5.835              | 4.696   | 2.65E-06 | TRUE              |
| XPO5      | 28.498 | 0   | 5.833              | 4.691   | 2.72E-06 | TRUE              |
| VPS45     | 28.403 | 0   | 5.828              | 4.683   | 2.83E-06 | TRUE              |
| PLEC      | 15.385 | 0   | 4.943              | 4.628   | 3.68E-06 | TRUE              |
| DHX29     | 15.370 | 0   | 4.942              | 4.626   | 3.72E-06 | TRUE              |
| DNM1L     | 27.686 | 0   | 5.791              | 4.617   | 3.90E-06 | TRUE              |
| VPS33B    | 27.478 | 0   | 5.780              | 4.597   | 4.28E-06 | TRUE              |
| DVL1      | 27.439 | 0   | 5.778              | 4.594   | 4.35E-06 | TRUE              |
| DVL3      | 27.383 | 0   | 5.775              | 4.588   | 4.46E-06 | TRUE              |
| EIF2A     | 27.383 | 0   | 5.775              | 4.588   | 4.46E-06 | TRUE              |
| ARHGEF16  | 26.976 | 0   | 5.754              | 4.550   | 5.36E-06 | TRUE              |
| PRRC2A    | 26.826 | 0   | 5.746              | 4.536   | 5.73E-06 | TRUE              |
| XRN1      | 26.726 | 0   | 5.740              | 4.527   | 5.99E-06 | TRUE              |
| CORO1B    | 26.726 | 0   | 5.740              | 4.527   | 5.99E-06 | TRUE              |
| POLD1     | 26.646 | 0   | 5.736              | 4.519   | 6.21E-06 | TRUE              |
| SRGAP1    | 26.604 | 0   | 5.734              | 4.515   | 6.33E-06 | TRUE              |
| VCP1P1    | 26.384 | 0   | 5.722              | 4.494   | 6.98E-06 | TRUE              |
| NT5C2     | 26.287 | 0   | 5.716              | 4.485   | 7.29E-06 | TRUE              |
| VIPAS39   | 26.239 | 0   | 5.714              | 4.480   | 7.45E-06 | TRUE              |
| LUC7L     | 26.235 | 0   | 5.713              | 4.480   | 7.46E-06 | TRUE              |
| AFDN      | 26.042 | 0   | 5.703              | 4.462   | 8.14E-06 | TRUE              |
| SF3B3     | 26.030 | 0   | 5.702              | 4.460   | 8.18E-06 | TRUE              |
| NONO      | 26.019 | 0   | 5.701              | 4.459   | 8.22E-06 | TRUE              |
| SYNJ2     | 25.812 | 0   | 5.690              | 4.439   | 9.03E-06 | TRUE              |
| RBSN      | 25.792 | 0   | 5.689              | 4.437   | 9.11E-06 | TRUE              |
| DIP2B     | 25.741 | 0   | 5.686              | 4.433   | 9.31E-06 | TRUE              |
| EIF2S1    | 25.736 | 0   | 5.686              | 4.432   | 9.34E-06 | TRUE              |
| DPP9      | 25.612 | 0   | 5.679              | 4.420   | 9.87E-06 | TRUE              |
| GRK2      | 25.573 | 0   | 5.677              | 4.416   | 1.00E-05 | TRUE              |
| RFC4      | 25.526 | 0   | 5.674              | 4.412   | 1.03E-05 | TRUE              |
| PIK3CA    | 25.414 | 0   | 5.668              | 4.401   | 1.08E-05 | TRUE              |
| PSPC1     | 25.404 | 0   | 5.667              | 4.400   | 1.08E-05 | TRUE              |
| ATAD3B    | 25.371 | 0   | 5.665              | 4.396   | 1.10E-05 | TRUE              |
| SLFN5     | 25.257 | 0   | 5.659              | 4.385   | 1.16E-05 | TRUE              |
| CD2AP     | 25.133 | 0   | 5.652              | 4.373   | 1.22E-05 | TRUE              |
| MAPRE1    | 25.069 | 0   | 5.648              | 4.367   | 1.26E-05 | TRUE              |
| GMPS      | 25.053 | 0   | 5.647              | 4.365   | 1.27E-05 | TRUE              |
| OCRL      | 25.002 | 0   | 5.644              | 4.360   | 1.30E-05 | TRUE              |
| POTEF     | 24.993 | 0   | 5.643              | 4.359   | 1.30E-05 | TRUE              |
| TCF25     | 24.989 | 0   | 5.643              | 4.359   | 1.31E-05 | TRUE              |
| EFCAB7    | 24.941 | 0   | 5.640              | 4.354   | 1.34E-05 | TRUE              |
| CAPN7     | 24.941 | 0   | 5.640              | 4.354   | 1.34E-05 | TRUE              |
| VPS11     | 24.923 | 0   | 5.639              | 4.352   | 1.35E-05 | TRUE              |
| ABR       | 24.918 | 0   | 5.639              | 4.352   | 1.35E-05 | TRUE              |
| RAB11FIP2 | 24.876 | 0   | 5.637              | 4.348   | 1.37E-05 | TRUE              |
| KIAA1211L | 24.867 | 0   | 5.636              | 4.347   | 1.38E-05 | TRUE              |
| LRRRC31   | 24.775 | 0   | 5.631              | 4.338   | 1.44E-05 | TRUE              |
| NAA35     | 24.729 | 0   | 5.628              | 4.333   | 1.47E-05 | TRUE              |
| TRIP10    | 24.723 | 0   | 5.628              | 4.333   | 1.47E-05 | TRUE              |
| RECQL     | 24.702 | 0   | 5.627              | 4.331   | 1.49E-05 | TRUE              |
| GNPDA1    | 24.692 | 0   | 5.626              | 4.330   | 1.49E-05 | TRUE              |
| VIPR1     | 24.676 | 0   | 5.625              | 4.328   | 1.51E-05 | TRUE              |
| PDS5A     | 24.665 | 0   | 5.624              | 4.327   | 1.51E-05 | TRUE              |
| GLB1L     | 24.654 | 0   | 5.624              | 4.326   | 1.52E-05 | TRUE              |
| CTPS2     | 24.638 | 0   | 5.623              | 4.324   | 1.53E-05 | TRUE              |
| SNX2      | 24.632 | 0   | 5.622              | 4.324   | 1.54E-05 | TRUE              |
| MYH10     | 24.626 | 0   | 5.622              | 4.323   | 1.54E-05 | TRUE              |
| FER1L6    | 24.593 | 0   | 5.620              | 4.320   | 1.56E-05 | TRUE              |

|          |        |   |       |       |          |      |
|----------|--------|---|-------|-------|----------|------|
| SEC11B   | 24.564 | 0 | 5.618 | 4.317 | 1.58E-05 | TRUE |
| SRP68    | 24.564 | 0 | 5.618 | 4.317 | 1.58E-05 | TRUE |
| TP53     | 24.558 | 0 | 5.618 | 4.316 | 1.59E-05 | TRUE |
| SNX18    | 24.517 | 0 | 5.616 | 4.312 | 1.62E-05 | TRUE |
| ACTR2    | 24.511 | 0 | 5.615 | 4.311 | 1.62E-05 | TRUE |
| STXBP3   | 24.468 | 0 | 5.613 | 4.307 | 1.65E-05 | TRUE |
| LRRC47   | 24.468 | 0 | 5.613 | 4.307 | 1.65E-05 | TRUE |
| EML4     | 24.468 | 0 | 5.613 | 4.307 | 1.65E-05 | TRUE |
| ILK      | 24.461 | 0 | 5.612 | 4.307 | 1.66E-05 | TRUE |
| CACYBP   | 24.384 | 0 | 5.608 | 4.299 | 1.72E-05 | TRUE |
| FAM91A1  | 24.331 | 0 | 5.605 | 4.293 | 1.76E-05 | TRUE |
| CWF19L2  | 24.303 | 0 | 5.603 | 4.291 | 1.78E-05 | TRUE |
| PLCB3    | 24.296 | 0 | 5.603 | 4.290 | 1.79E-05 | TRUE |
| EIF3J    | 24.282 | 0 | 5.602 | 4.289 | 1.80E-05 | TRUE |
| PSMD5    | 24.261 | 0 | 5.601 | 4.286 | 1.82E-05 | TRUE |
| COPB2    | 24.217 | 0 | 5.598 | 4.282 | 1.85E-05 | TRUE |
| RPS6KA1  | 24.187 | 0 | 5.596 | 4.279 | 1.88E-05 | TRUE |
| CAMSAP3  | 24.187 | 0 | 5.596 | 4.279 | 1.88E-05 | TRUE |
| TUBA3E   | 24.179 | 0 | 5.596 | 4.278 | 1.88E-05 | TRUE |
| ZC3HAV1  | 24.179 | 0 | 5.596 | 4.278 | 1.88E-05 | TRUE |
| PIK3C2A  | 24.164 | 0 | 5.595 | 4.277 | 1.90E-05 | TRUE |
| ADAM20   | 24.164 | 0 | 5.595 | 4.277 | 1.90E-05 | TRUE |
| RANGAP1  | 24.157 | 0 | 5.594 | 4.276 | 1.90E-05 | TRUE |
| EHD1     | 24.149 | 0 | 5.594 | 4.275 | 1.91E-05 | TRUE |
| BCR      | 24.141 | 0 | 5.593 | 4.274 | 1.92E-05 | TRUE |
| RPAP3    | 24.141 | 0 | 5.593 | 4.274 | 1.92E-05 | TRUE |
| DGKA     | 24.117 | 0 | 5.592 | 4.272 | 1.94E-05 | TRUE |
| MYH16    | 24.109 | 0 | 5.592 | 4.271 | 1.94E-05 | TRUE |
| DBNL     | 24.101 | 0 | 5.591 | 4.270 | 1.95E-05 | TRUE |
| PIK3C2B  | 24.085 | 0 | 5.590 | 4.269 | 1.97E-05 | TRUE |
| TBC1D2   | 24.069 | 0 | 5.589 | 4.267 | 1.98E-05 | TRUE |
| VPS33A   | 24.019 | 0 | 5.586 | 4.262 | 2.02E-05 | TRUE |
| MICALL2  | 24.002 | 0 | 5.585 | 4.260 | 2.04E-05 | TRUE |
| OGT      | 23.993 | 0 | 5.585 | 4.260 | 2.05E-05 | TRUE |
| MAP3K7   | 23.993 | 0 | 5.585 | 4.260 | 2.05E-05 | TRUE |
| RAPH1    | 23.985 | 0 | 5.584 | 4.259 | 2.06E-05 | TRUE |
| UBASH3B  | 23.985 | 0 | 5.584 | 4.259 | 2.06E-05 | TRUE |
| ORC3     | 23.976 | 0 | 5.584 | 4.258 | 2.06E-05 | TRUE |
| WDR1     | 23.949 | 0 | 5.582 | 4.255 | 2.09E-05 | TRUE |
| SKIV2L   | 23.923 | 0 | 5.580 | 4.252 | 2.12E-05 | TRUE |
| BCAS3    | 23.913 | 0 | 5.580 | 4.251 | 2.12E-05 | TRUE |
| FAM83H   | 23.886 | 0 | 5.578 | 4.249 | 2.15E-05 | TRUE |
| STAT3    | 23.876 | 0 | 5.578 | 4.248 | 2.16E-05 | TRUE |
| CAPN2    | 23.848 | 0 | 5.576 | 4.245 | 2.19E-05 | TRUE |
| PRKAR2A  | 23.829 | 0 | 5.575 | 4.243 | 2.21E-05 | TRUE |
| WASHC5   | 23.809 | 0 | 5.573 | 4.241 | 2.23E-05 | TRUE |
| NUDC     | 23.809 | 0 | 5.573 | 4.241 | 2.23E-05 | TRUE |
| RNPC3    | 23.770 | 0 | 5.571 | 4.237 | 2.27E-05 | TRUE |
| AGPS     | 23.729 | 0 | 5.569 | 4.233 | 2.31E-05 | TRUE |
| IGF2BP3  | 23.729 | 0 | 5.569 | 4.233 | 2.31E-05 | TRUE |
| CSDE1    | 23.729 | 0 | 5.569 | 4.233 | 2.31E-05 | TRUE |
| ARFGAP2  | 23.718 | 0 | 5.568 | 4.232 | 2.32E-05 | TRUE |
| NSFL1C   | 23.708 | 0 | 5.567 | 4.231 | 2.33E-05 | TRUE |
| RIPK2    | 23.697 | 0 | 5.567 | 4.229 | 2.34E-05 | TRUE |
| LIN54    | 23.686 | 0 | 5.566 | 4.228 | 2.35E-05 | TRUE |
| SHMT2    | 23.665 | 0 | 5.565 | 4.226 | 2.38E-05 | TRUE |
| RPTOR    | 23.665 | 0 | 5.565 | 4.226 | 2.38E-05 | TRUE |
| GEMIN5   | 23.665 | 0 | 5.565 | 4.226 | 2.38E-05 | TRUE |
| SNX8     | 23.654 | 0 | 5.564 | 4.225 | 2.39E-05 | TRUE |
| DVL2     | 23.621 | 0 | 5.562 | 4.222 | 2.42E-05 | TRUE |
| VLDLR    | 23.610 | 0 | 5.561 | 4.221 | 2.44E-05 | TRUE |
| AGO3     | 23.598 | 0 | 5.561 | 4.219 | 2.45E-05 | TRUE |
| SMARCAL1 | 23.598 | 0 | 5.561 | 4.219 | 2.45E-05 | TRUE |
| GSK3B    | 23.587 | 0 | 5.560 | 4.218 | 2.46E-05 | TRUE |
| MIOS     | 23.587 | 0 | 5.560 | 4.218 | 2.46E-05 | TRUE |
| RRM1     | 23.552 | 0 | 5.558 | 4.215 | 2.50E-05 | TRUE |
| CTPS1    | 23.540 | 0 | 5.557 | 4.213 | 2.51E-05 | TRUE |
| SPIRE1   | 23.529 | 0 | 5.556 | 4.212 | 2.53E-05 | TRUE |
| TAB3     | 23.504 | 0 | 5.555 | 4.210 | 2.56E-05 | TRUE |
| MPHOSPH8 | 23.504 | 0 | 5.555 | 4.210 | 2.56E-05 | TRUE |
| TAB1     | 23.480 | 0 | 5.553 | 4.207 | 2.58E-05 | TRUE |
| EEF1B2   | 23.455 | 0 | 5.552 | 4.205 | 2.61E-05 | TRUE |
| DPYSL2   | 23.455 | 0 | 5.552 | 4.205 | 2.61E-05 | TRUE |
| LRRC40   | 23.455 | 0 | 5.552 | 4.205 | 2.61E-05 | TRUE |
| OAS3     | 23.455 | 0 | 5.552 | 4.205 | 2.61E-05 | TRUE |
| SRP72    | 23.430 | 0 | 5.550 | 4.202 | 2.64E-05 | TRUE |
| RAB3GAP2 | 23.430 | 0 | 5.550 | 4.202 | 2.64E-05 | TRUE |
| AGO4     | 23.430 | 0 | 5.550 | 4.202 | 2.64E-05 | TRUE |
| AGO1     | 23.430 | 0 | 5.550 | 4.202 | 2.64E-05 | TRUE |
| G3BP2    | 23.430 | 0 | 5.550 | 4.202 | 2.64E-05 | TRUE |
| MTMR12   | 23.404 | 0 | 5.549 | 4.199 | 2.68E-05 | TRUE |

|           |        |   |       |       |          |      |
|-----------|--------|---|-------|-------|----------|------|
| AGO2      | 23.404 | 0 | 5.549 | 4.199 | 2.68E-05 | TRUE |
| SH3KBP1   | 23.378 | 0 | 5.547 | 4.197 | 2.71E-05 | TRUE |
| VPS53     | 23.324 | 0 | 5.544 | 4.191 | 2.77E-05 | TRUE |
| FBXL18    | 23.324 | 0 | 5.544 | 4.191 | 2.77E-05 | TRUE |
| NT5DC2    | 23.310 | 0 | 5.543 | 4.190 | 2.79E-05 | TRUE |
| COBL      | 23.296 | 0 | 5.542 | 4.188 | 2.81E-05 | TRUE |
| MINK1     | 23.296 | 0 | 5.542 | 4.188 | 2.81E-05 | TRUE |
| STXBP1    | 23.282 | 0 | 5.541 | 4.187 | 2.83E-05 | TRUE |
| ABCB1     | 23.268 | 0 | 5.540 | 4.185 | 2.85E-05 | TRUE |
| ABCB4     | 23.268 | 0 | 5.540 | 4.185 | 2.85E-05 | TRUE |
| HPS3      | 23.268 | 0 | 5.540 | 4.185 | 2.85E-05 | TRUE |
| SARS      | 23.249 | 0 | 5.539 | 4.184 | 2.87E-05 | TRUE |
| PITPNM1   | 23.240 | 0 | 5.539 | 4.183 | 2.88E-05 | TRUE |
| RAPGEF6   | 23.238 | 0 | 5.538 | 4.182 | 2.89E-05 | TRUE |
| ARHGEF1   | 23.213 | 0 | 5.537 | 4.180 | 2.92E-05 | TRUE |
| DHX38     | 23.205 | 0 | 5.536 | 4.179 | 2.93E-05 | TRUE |
| AKAP2     | 23.192 | 0 | 5.536 | 4.178 | 2.95E-05 | TRUE |
| SH3PXD2B  | 23.190 | 0 | 5.535 | 4.177 | 2.95E-05 | TRUE |
| PACS1     | 23.170 | 0 | 5.534 | 4.175 | 2.97E-05 | TRUE |
| MTM1      | 23.169 | 0 | 5.534 | 4.175 | 2.98E-05 | TRUE |
| AFAP1L2   | 23.152 | 0 | 5.533 | 4.174 | 3.00E-05 | TRUE |
| SLFN13    | 23.111 | 0 | 5.531 | 4.169 | 3.06E-05 | TRUE |
| INPPL1    | 23.100 | 0 | 5.530 | 4.168 | 3.07E-05 | TRUE |
| SCFD1     | 23.074 | 0 | 5.528 | 4.165 | 3.11E-05 | TRUE |
| ATXN2L    | 23.071 | 0 | 5.528 | 4.165 | 3.11E-05 | TRUE |
| AGPAT1    | 23.071 | 0 | 5.528 | 4.165 | 3.11E-05 | TRUE |
| TEX9      | 23.048 | 0 | 5.527 | 4.163 | 3.14E-05 | TRUE |
| ANLN      | 23.044 | 0 | 5.526 | 4.162 | 3.15E-05 | TRUE |
| ARHGAP29  | 23.041 | 0 | 5.526 | 4.162 | 3.15E-05 | TRUE |
| SETMAR    | 23.021 | 0 | 5.525 | 4.160 | 3.18E-05 | TRUE |
| SH3GL1    | 23.017 | 0 | 5.525 | 4.160 | 3.19E-05 | TRUE |
| TBL3      | 23.007 | 0 | 5.524 | 4.159 | 3.20E-05 | TRUE |
| FAM83F    | 22.981 | 0 | 5.522 | 4.156 | 3.24E-05 | TRUE |
| MYL6B     | 22.976 | 0 | 5.522 | 4.155 | 3.25E-05 | TRUE |
| MYL6      | 22.976 | 0 | 5.522 | 4.155 | 3.25E-05 | TRUE |
| EGLN1     | 22.967 | 0 | 5.522 | 4.154 | 3.26E-05 | TRUE |
| BAlAP2    | 22.955 | 0 | 5.521 | 4.153 | 3.28E-05 | TRUE |
| CPNE2     | 22.948 | 0 | 5.520 | 4.152 | 3.29E-05 | TRUE |
| OSBPL10   | 22.941 | 0 | 5.520 | 4.152 | 3.30E-05 | TRUE |
| PPP2R2B   | 22.937 | 0 | 5.520 | 4.151 | 3.31E-05 | TRUE |
| NACA2     | 22.937 | 0 | 5.520 | 4.151 | 3.31E-05 | TRUE |
| ABCF3     | 22.930 | 0 | 5.519 | 4.150 | 3.32E-05 | TRUE |
| TCAF2     | 22.923 | 0 | 5.519 | 4.150 | 3.33E-05 | TRUE |
| PYGB      | 22.917 | 0 | 5.518 | 4.149 | 3.34E-05 | TRUE |
| FAM129B   | 22.913 | 0 | 5.518 | 4.149 | 3.34E-05 | TRUE |
| CARD11    | 22.912 | 0 | 5.518 | 4.149 | 3.35E-05 | TRUE |
| MAP4K2    | 22.904 | 0 | 5.518 | 4.148 | 3.36E-05 | TRUE |
| PTPN23    | 22.873 | 0 | 5.516 | 4.145 | 3.40E-05 | TRUE |
| RASAL2    | 22.823 | 0 | 5.512 | 4.139 | 3.48E-05 | TRUE |
| ANXA2P2   | 22.819 | 0 | 5.512 | 4.139 | 3.49E-05 | TRUE |
| NDUFS2    | 22.807 | 0 | 5.511 | 4.138 | 3.51E-05 | TRUE |
| ACSL4     | 22.797 | 0 | 5.511 | 4.137 | 3.52E-05 | TRUE |
| CAMK2D    | 22.794 | 0 | 5.511 | 4.136 | 3.53E-05 | TRUE |
| HPS6      | 22.782 | 0 | 5.510 | 4.135 | 3.55E-05 | TRUE |
| PLS3      | 22.772 | 0 | 5.509 | 4.134 | 3.56E-05 | TRUE |
| HSP90AA2P | 22.749 | 0 | 5.508 | 4.132 | 3.60E-05 | TRUE |
| FNBP1L    | 22.747 | 0 | 5.508 | 4.131 | 3.60E-05 | TRUE |
| MYO1C     | 22.731 | 0 | 5.507 | 4.130 | 3.63E-05 | TRUE |
| GNE       | 22.722 | 0 | 5.506 | 4.129 | 3.65E-05 | TRUE |
| SRP54     | 22.710 | 0 | 5.505 | 4.128 | 3.67E-05 | TRUE |
| PA2G4     | 22.703 | 0 | 5.505 | 4.127 | 3.68E-05 | TRUE |
| DZIP1     | 22.682 | 0 | 5.503 | 4.125 | 3.71E-05 | TRUE |
| PDLIM1    | 22.650 | 0 | 5.501 | 4.121 | 3.77E-05 | TRUE |
| WDR70     | 22.650 | 0 | 5.501 | 4.121 | 3.77E-05 | TRUE |
| DHX57     | 22.645 | 0 | 5.501 | 4.121 | 3.78E-05 | TRUE |
| MTREX     | 22.639 | 0 | 5.501 | 4.120 | 3.79E-05 | TRUE |
| TBK1      | 22.634 | 0 | 5.500 | 4.120 | 3.79E-05 | TRUE |
| DIEXF     | 22.619 | 0 | 5.499 | 4.118 | 3.82E-05 | TRUE |
| HSPA1L    | 22.610 | 0 | 5.499 | 4.117 | 3.84E-05 | TRUE |
| CKAP5     | 22.610 | 0 | 5.499 | 4.117 | 3.84E-05 | TRUE |
| UNC45A    | 22.589 | 0 | 5.498 | 4.115 | 3.87E-05 | TRUE |
| SLC27A4   | 22.582 | 0 | 5.497 | 4.114 | 3.89E-05 | TRUE |
| DAB2IP    | 22.573 | 0 | 5.497 | 4.113 | 3.90E-05 | TRUE |
| SACM1L    | 22.573 | 0 | 5.497 | 4.113 | 3.90E-05 | TRUE |
| DNAJA2    | 22.543 | 0 | 5.495 | 4.110 | 3.96E-05 | TRUE |
| SUPV3L1   | 22.533 | 0 | 5.494 | 4.109 | 3.97E-05 | TRUE |
| CAMK2G    | 22.526 | 0 | 5.494 | 4.108 | 3.99E-05 | TRUE |
| PPP1R13L  | 22.517 | 0 | 5.493 | 4.107 | 4.00E-05 | TRUE |
| POLD2     | 22.490 | 0 | 5.491 | 4.104 | 4.05E-05 | TRUE |
| SMG9      | 22.485 | 0 | 5.491 | 4.104 | 4.06E-05 | TRUE |
| CLEC16A   | 22.480 | 0 | 5.491 | 4.103 | 4.07E-05 | TRUE |

|        |        |   |       |       |          |      |
|--------|--------|---|-------|-------|----------|------|
| DOCK9  | 22.480 | 0 | 5.491 | 4.103 | 4.07E-05 | TRUE |
| PIK3CB | 22.465 | 0 | 5.490 | 4.102 | 4.10E-05 | TRUE |
| CLINT1 | 22.460 | 0 | 5.489 | 4.101 | 4.11E-05 | TRUE |

---
